# Supplementary material for: Insight into ETS-10 synthesis for the preparation of mixed matrix membranes for CO2/CH4 gas separation
Source: Royal Society of Chemistry journal article supplement (doi:10.1039/c5ra20172a), 2015-01-01
Supplement: c5ra20172a1.pdf [file c5ra20172a1.pdf]

**Insight into ETS-10 synthesis for the preparation of mixed matrix membranes for CO<sub>2</sub>/CH<sub>4</sub> gas separation**

Sara Sorribas,<sup>a</sup> Bibiana Comesaña-Gándara<sup>b</sup>, Angel E Lozano<sup>b,c</sup>, Beatriz Zornoza,<sup>a</sup> Carlos Téllez<sup>a</sup>, and Joaquín Coronas<sup>a,\*</sup>

<sup>a</sup>Chemical and Environmental Engineering Department and Instituto de Nanociencia de Aragón (INA), Universidad de Zaragoza, 50018 Zaragoza, Spain.

<sup>b</sup>Department of Macromolecular Chemistry, Institute of Polymer Science and Technology, ICTP-CSIC, 28006 Madrid, Spain

<sup>c</sup>SMAP, UVa-CSIC Research Unit, University of Valladolid, 47011 Valladolid, Spain

\*Corresponding author. Phone: (+34) 976762471; Fax: (+34) 976 761879; E-mail:

coronas@unizar.es

**Table S1.** Synthesis conditions, crystal size and final product of different ETS-10 syntheses. Ti1 and Ti2 correspond to anatase with particle sizes of 200-300 nm and 25 nm, respectively. The nomenclature used is “Ti source\_ temperature\_ time”, i. e., the first sample is labeled Ti1\_230 °C\_ 9h.

| Synthesis          | Temperature | Ti source                                | Time (h) | Product <sup>a</sup>    | Crystal size (μm) <sup>b</sup> |
|--------------------|-------------|------------------------------------------|----------|-------------------------|--------------------------------|
| 230_ti source_time | 230 °C      | Ti1                                      | 9        | ETS-10, anatase, quartz | 0.6 ± 0.1<br>0.34 ± 0.06       |
|                    |             |                                          | 15       | ETS-10, anatase         | 0.5 ± 0.1<br>0.33 ± 0.07       |
|                    |             |                                          | 24       | ETS-10                  | 0.7 ± 0.1<br>0.39 ± 0.07       |
|                    |             | Ti2                                      | 9-24     | --                      | --                             |
|                    |             | TiCl <sub>3</sub><br>(with ETS-10 seeds) | 5        | ETS-10, amorphous       | 1.7 ± 0.3<br>2.0 ± 0.3         |
|                    |             |                                          | 24       | ETS-10                  | 1.9 ± 0.2<br>2.3 ± 0.3         |
|                    |             |                                          | 48       | ETS-10                  | 2.9 ± 0.4<br>3.2 ± 0.4         |
| 195_ti source_time | 195 °C      | Ti1                                      | 15       | Anatase                 | --                             |
|                    |             | Ti2                                      | 15       | ETS-10                  | 0.5 ± 0.1<br>0.29 ± 0.06       |
|                    |             |                                          | 36       | ETS-10, quartz          | 0.37 ± 0.06<br>0.24 ± 0.06     |
|                    |             |                                          | 48       | Q, ETS-10               | --                             |
|                    |             | TiCl <sub>3</sub><br>(with ETS-10 seeds) | 24       | ETS-10, amorphous       | 1.8 ± 0.2<br>1.9 ± 0.2         |
|                    |             |                                          | 48       | ETS-10                  | 2.2 ± 0.3<br>2.3 ± 0.4         |
| 180_ti source_time | 180 °C      | Ti1                                      | 15-24    | Anatase                 | --                             |
|                    |             | Ti2                                      | 15       | Anatase, ETS-10         | 0.31 ± 0.04                    |
|                    |             |                                          | 24       | ETS-10, anatase         | 0.49 ± 0.07<br>0.28 ± 0.06     |
|                    |             |                                          | 48       | ETS-10, ETS-4, anatase  | 0.44±0.07<br>0.21±0.04         |
|                    |             | TiCl <sub>3</sub><br>(with ETS-10 seeds) | 48       | ETS-10, amorphous       | 0.08 ± 0.02                    |
|                    |             |                                          | 62       | ETS-10, AM-3, ETS-4     | --                             |

<sup>a</sup> From XRD data; the major product appears at the first place.

<sup>b</sup> First value corresponds to crystal size in direction c, and second value corresponds to crystal size in directions a=b. Values correspond to the average of 20 particles measured by IMAQ Vision Builder program and errors correspond to standard deviation.

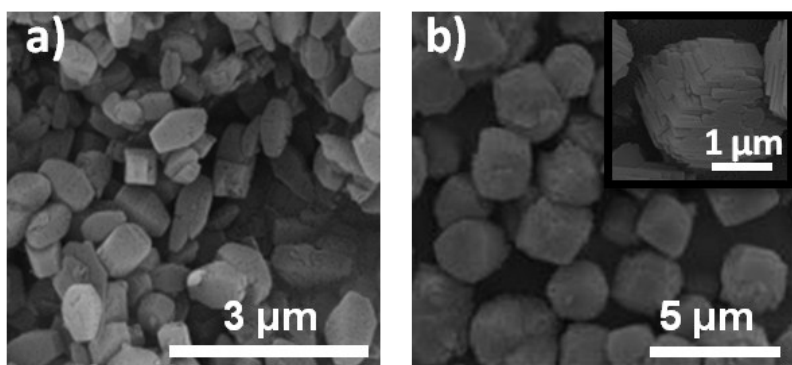

**Figure S1.** SEM images of ETS-10 crystals a) Ti1\_230\_24h, b) TiCl<sub>3</sub>\_230\_24h.
